# Supplementary material for: COVID-19: Short-term forecast of ICU beds in times of crisis
Source: PubMed Central journal article supplement (PMC7806165; doi:10.1371/journal.pone.0245272), 2021-01-13
Supplement: pone.0245272.s001.pdf [file pone.0245272.s001.pdf]

**S1 Table. Implementation Details.** List of libraries and the corresponding parameters used (optional).

| Model        | R package | Reference | Function     | Parameters                                                                                         |
|--------------|-----------|-----------|--------------|----------------------------------------------------------------------------------------------------|
| ARIMA ARIMAX | forecast  | (44)      | auto.arima() | allowdrift = TRUE<br>allowmean = TRUE<br>seasonal = FALSE<br>biasadj = TRUE<br>lambda = "auto"     |
| TBATS        | forecast  | (44)      | tbats()      | use.damped.trend = TRUE<br>use.trend = TRUE<br>use.arma.errors = TRUE<br>biasadj = TRUE            |
| GMDH         | GMDH      | (53)      | fcast()      | layer = 15                                                                                         |
| MLPR         | nnfor     | (64)      | mlp()        | reps = 15<br>difforder = NULL<br>xreg.lags = list(7, 7, 11, 11)<br>hd = c(5, 10, 10, 5)            |
| ELM          | nnfor     | (64)      | elm()        | reps = 15<br>difforder = NULL<br>xreg.lags = list(7, 7, 11, 11)<br>direct = TRUE<br>type = "lasso" |

## Reference

64. Kourentzes N. nnfor: Time Series Forecasting with Neural Networks; 2019. Available from: <https://CRAN.R-project.org/package=nnfor>.
