# Supplementary material for: COVID-19: Short-term forecast of ICU beds in times of crisis
Source: PubMed Central journal article supplement (PMC7806165; doi:10.1371/journal.pone.0245272), 2021-01-13
Supplement: pone.0245272.s002.pdf [file pone.0245272.s002.pdf]

**S2 Table. Model performances in other regions. Historical MAPE per Model - Valparaíso Region**

| Date       | 1rst week |        |       |        |       |       |       |       |       | 2nd week |        |       |        |        |       |       |       |        |
|------------|-----------|--------|-------|--------|-------|-------|-------|-------|-------|----------|--------|-------|--------|--------|-------|-------|-------|--------|
|            | Ensemble  | MEDIAN | MEAN  | ARIMAX | MLPR  | ELM   | TBATS | GMDH  | ICD   | Ensemble | MEDIAN | MEAN  | ARIMAX | MLPR   | ELM   | TBATS | GMDH  | ICD    |
| 2020-05-20 | 23.27     | 23.06  | 33.43 | 29.01  | 22.90 | 30.59 | 22.94 |       | 13.77 | 50.90    | 54.78  | 58.85 | 62.64  | 54.68  | 62.17 | 54.04 |       | 24.11  |
| 2020-05-22 | 35.85     | 40.83  | 47.49 | 41.46  | 36.75 | 47.57 | 41.15 |       | 26.85 | 51.70    | 62.50  | 62.61 | 62.58  | 58.06  | 68.92 | 62.69 |       | 27.75  |
| 2020-05-24 | 23.80     | 27.09  | 36.60 | 32.98  | 25.90 | 28.03 | 21.83 |       | 20.39 | 25.97    | 34.40  | 40.92 | 45.69  | 32.40  | 36.84 | 22.67 |       | 14.48  |
| 2020-05-26 | 9.13      | 9.88   | 21.48 | 10.11  | 10.81 | 15.01 | 4.16  |       | 7.40  | 15.13    | 11.30  | 10.62 | 11.47  | 46.07  | 12.38 | 33.74 |       | 12.42  |
| 2020-05-28 | 7.68      | 8.45   | 14.76 | 8.56   | 29.58 | 13.88 | 7.58  |       | 7.18  | 14.97    | 9.77   | 12.45 | 9.73   | 117.12 | 8.33  | 35.30 |       | 23.17  |
| 2020-05-30 | 12.75     | 12.35  | 11.76 | 12.05  | 38.68 | 10.65 | 24.10 |       | 16.25 | 32.30    | 29.81  | 32.05 | 29.71  | 121.03 | 21.93 | 74.11 |       | 48.13  |
| 2020-06-01 | 24.72     | 19.73  | 13.04 | 19.44  | 55.60 | 17.53 | 30.53 |       | 31.37 | 41.87    | 31.87  | 33.15 | 31.83  | 133.56 | 20.02 | 58.89 |       | 56.74  |
| 2020-06-03 | 15.94     | 11.97  | 3.81  | 11.85  | 19.11 | 6.71  | 15.96 |       | 26.08 | 22.84    | 19.91  | 6.86  | 19.91  | 24.54  | 4.69  | 29.51 |       | 42.86  |
| 2020-06-05 | 11.13     | 6.31   | 6.20  | 6.51   | 12.20 | 4.53  | 5.17  |       | 23.72 | 18.80    | 9.23   | 4.19  | 14.89  | 3.71   | 3.44  | 8.43  |       | 56.28  |
| 2020-06-07 | 6.24      | 3.51   | 11.12 | 3.78   | 3.81  | 4.35  | 4.20  |       | 30.77 | 26.73    | 4.83   | 4.85  | 4.23   | 9.92   | 5.50  | 5.85  |       | 105.94 |
| 2020-06-09 | 5.12      | 3.32   | 12.63 | 3.43   | 3.62  | 3.72  | 4.80  |       | 17.33 | 14.03    | 6.46   | 6.94  | 4.61   | 11.72  | 6.08  | 10.04 |       | 67.59  |
| 2020-06-11 | 17.54     | 11.27  | 14.47 | 8.22   | 17.55 | 6.30  | 9.07  | 13.62 | 35.34 | 23.47    | 10.99  | 17.56 | 9.44   | 18.19  | 3.50  | 5.46  | 18.00 | 61.54  |
| 2020-06-13 | 8.00      | 5.24   | 5.73  | 8.89   | 4.24  | 5.24  | 4.08  | 8.79  | 27.08 | 11.45    | 3.63   | 6.27  | 10.14  | 5.45   | 3.63  | 11.49 | 21.63 | 55.30  |
| 2020-06-16 | 4.40      | 5.16   | 4.88  | 4.78   | 4.51  | 8.12  | 11.99 | 6.87  | 9.11  | 1.90     | 2.01   | 1.94  | 2.11   | 20.69  | 10.90 | 20.71 | 9.91  | 22.59  |
| 2020-06-18 | 6.23      | 5.19   | 6.16  | 4.65   | 7.33  | 9.05  | 10.61 | 8.44  | 4.81  | 5.24     | 4.47   | 4.09  | 5.61   | 8.06   | 9.73  | 14.73 | 11.95 | 4.40   |
| 2020-06-20 | 6.34      | 7.24   | 7.23  | 7.91   | 10.02 | 3.12  | 5.32  | 5.05  | 12.41 | 8.15     | 12.21  | 13.50 | 18.28  | 27.98  | 3.31  | 9.57  | 7.60  | 12.74  |
| 2020-06-22 | 3.17      | 2.35   | 2.37  | 1.83   | 4.70  | 2.61  | 2.66  | 2.34  | 6.89  | 3.30     | 4.92   | 4.77  | 9.87   | 8.40   | 2.18  | 2.08  | 2.75  | 5.90   |
| 2020-06-24 | 4.07      | 3.17   | 2.86  | 6.72   | 6.04  | 3.34  | 5.07  | 6.71  | 2.34  | 4.29     | 4.55   | 2.85  | 22.01  | 8.38   | 3.17  | 4.64  | 9.60  | 5.73   |
| 2020-06-26 | 5.10      | 6.42   | 7.91  | 11.17  | 12.90 | 6.38  | 5.50  | 5.66  | 3.04  | 8.47     | 12.00  | 15.34 | 24.12  | 25.03  | 12.00 | 7.86  | 10.85 | 4.59   |
| 2020-06-28 | 6.62      | 8.89   | 9.44  | 10.54  | 17.78 | 8.88  | 7.07  | 6.14  | 4.38  | 8.57     | 14.91  | 15.53 | 20.71  | 32.75  | 14.91 | 7.97  | 9.66  | 3.68   |
| 2020-06-30 | 2.76      | 2.59   | 2.47  | 5.25   | 4.91  | 4.36  | 2.87  | 2.58  | 2.75  | 7.38     | 8.11   | 8.57  | 19.24  | 8.36   | 14.60 | 5.46  | 8.11  | 2.86   |
| 2020-07-02 | 5.98      | 5.49   | 4.93  | 3.72   | 6.67  | 3.48  | 7.68  | 5.59  | 5.44  | 2.24     | 10.09  | 7.04  | 16.77  | 10.09  | 14.43 | 2.81  | 2.69  | 4.71   |
| 2020-07-03 | 3.96      | 4.43   | 4.28  | 8.08   | 4.91  | 4.43  | 3.98  | 3.90  | 5.08  | 9.96     | 17.23  | 15.02 | 31.52  | 17.23  | 19.47 | 7.47  | 9.30  | 6.16   |
| 2020-07-07 | 12.45     | 14.51  | 12.68 | 16.47  | 17.58 | 14.51 | 13.21 | 7.17  | 4.50  | 24.70    | 31.91  | 27.29 | 39.77  | 30.97  | 35.04 | 30.80 | 14.98 | 2.62   |
| 2020-07-10 | 3.02      | 5.59   | 4.51  | 6.19   | 3.73  | 6.90  | 5.57  | 4.43  | 3.84  | 10.68    | 21.46  | 16.99 | 25.24  | 13.76  | 26.36 | 21.46 | 14.45 | 6.96   |
| 2020-07-14 | 3.12      | 5.95   | 4.97  | 9.15   | 5.90  | 6.90  | 4.46  | 5.55  | 5.86  | 8.15     | 16.77  | 15.32 | 27.04  | 9.88   | 22.88 | 15.14 | 16.77 | 9.19   |
| 2020-07-17 | 6.12      | 10.57  | 8.69  | 11.98  | 6.91  | 11.06 | 8.36  | 10.56 | 1.75  | 8.84     | 19.83  | 17.37 | 30.52  | 7.96   | 23.82 | 16.62 | 19.83 | 9.02   |
| 2020-07-21 | 3.19      | 5.31   | 4.49  | 4.42   | 6.56  | 5.35  | 5.06  | 7.48  | 5.82  | 7.80     | 13.67  | 10.29 | 10.94  | 19.72  | 15.43 | 13.61 | 8.33  | 17.56  |
| 2020-07-24 | 1.70      | 3.22   | 2.68  | 2.38   | 6.03  | 5.24  | 3.67  | 9.44  | 11.02 | 3.77     | 10.23  | 6.52  | 8.04   | 10.69  | 10.78 | 11.91 | 18.27 | 21.89  |
| 2020-07-28 | 2.13      | 2.47   | 2.34  | 3.25   | 3.06  | 5.72  | 2.45  | 4.29  | 5.80  | 7.25     | 12.39  | 12.07 | 12.58  | 10.84  | 19.10 | 11.48 | 23.69 | 5.91   |
| min        | 1.70      | 2.35   | 2.34  | 1.83   | 3.06  | 2.61  | 2.45  | 2.34  | 1.75  | 1.90     | 2.01   | 1.94  | 2.11   | 3.71   | 2.18  | 2.08  | 2.69  | 2.62   |
| max        | 35.85     | 40.83  | 47.49 | 41.46  | 55.60 | 47.57 | 41.15 | 13.62 | 35.34 | 51.70    | 62.50  | 62.61 | 62.64  | 133.56 | 68.92 | 74.11 | 23.69 | 105.94 |
| mean       | 9.38      | 9.39   | 10.85 | 10.49  | 13.68 | 10.12 | 10.04 | 6.56  | 12.61 | 16.03    | 16.88  | 16.39 | 21.37  | 30.24  | 17.19 | 20.55 | 12.55 | 24.76  |
| std        | 8.23      | 8.50   | 10.81 | 9.23   | 12.71 | 9.79  | 9.29  | 2.78  | 10.25 | 13.61    | 14.39  | 15.31 | 15.56  | 34.75  | 16.06 | 19.15 | 5.97  | 25.56  |
