# Supplementary material for: COVID-19: Short-term forecast of ICU beds in times of crisis
Source: PubMed Central journal article supplement (PMC7806165; doi:10.1371/journal.pone.0245272), 2021-01-13
Supplement: pone.0245272.s003.pdf [file pone.0245272.s003.pdf]

**S3 Table. Frequency of selection for each model.** Selection Frequency per Model across Iterations in Chile

| ZONE          | ARIMA | ARIMAX | MLPR  | ELM   | TBATS | GMDH  | ICD    |
|---------------|-------|--------|-------|-------|-------|-------|--------|
| Country       | 9.62  | 49.79  | 61.09 | 53.56 | 70.29 | 51.88 | 100.00 |
| Metropolitan  | 20.00 | 40.00  | 60.00 | 56.67 | 73.33 | 60.00 | 100.00 |
| Other Regions | 8.13  | 51.20  | 61.24 | 53.11 | 69.86 | 50.72 | 100.00 |
